# Supplementary material
Source: Springer Nature journal article supplement (https://mijn.bsl.nl/resource/supplementary/13047_2009_96_MOESM6_ESM.pdf/7109684)

**Arch index versus talo-navicular coverage angle**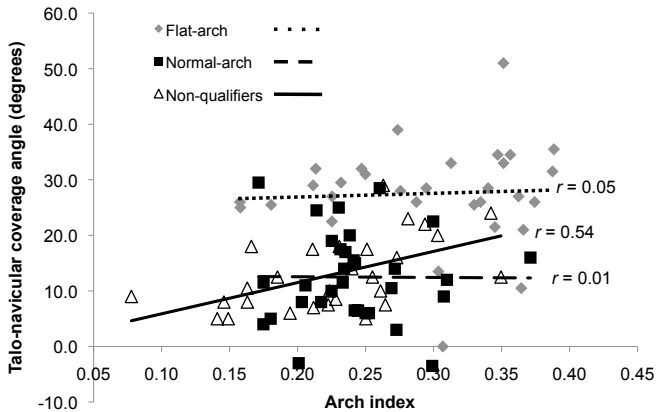**Arch index versus talus-second metatarsal angle**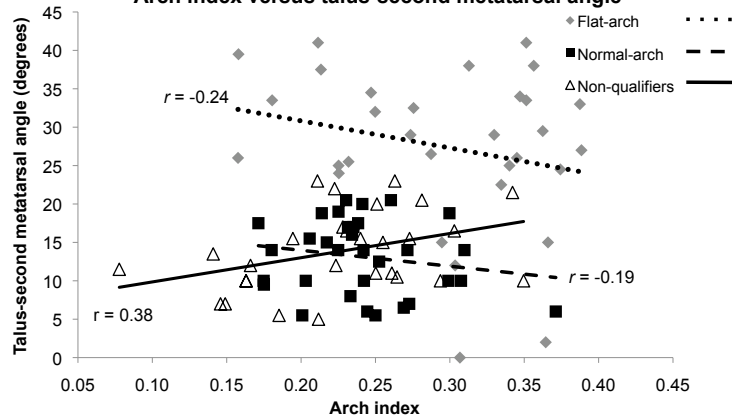**Arch index versus calcaneal inclination angle**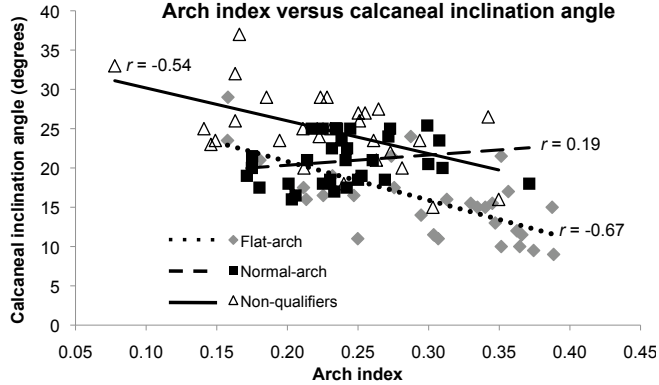**Arch index versus calcaneal-first metatarsal angle**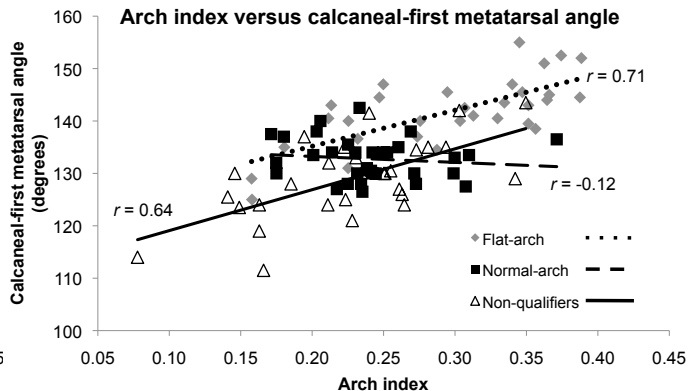

Supplement: MOESM6 [file 7109684]
